# Supplementary material for: Establishment and validation of early prediction model for hypertriglyceridemic severe acute pancreatitis
Source: Springer Nature journal article supplement (doi:10.1186/s12944-023-01984-z), 2023-12-08
Supplement: MOESM1 [file 12944_2023_1984_MOESM1_ESM.pdf]

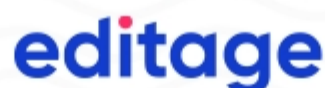

# Editing Certificate

This document certifies that the manuscript listed below has been edited to ensure language and grammar accuracy and is error free in these aspects. The logical presentation of ideas and the structure of the paper were also checked during the editing process. The edit was performed by professional editors at Editage, a brand of Cactus Communications. The author's core research ideas were not altered in any way during the editing process. The quality of the edit has been guaranteed, with the assumption that our suggested changes have been accepted and the text has not been further altered without the knowledge of our editors.

## MANUSCRIPT TITLE

**Establishment and Validation of Early Prediction Model for  
Hypertriglyceridemic Severe Acute Pancreatitis**

## AUTHORS

**Yi Shuanglian, Zeng Huiling, Lin Xunting, Deng Yifang, Lin Yufen, Xie Shanshan,  
Si Lijuan, LiuYunpeng**

## ISSUED ON

**November 28, 2023**

## JOB CODE

**YQOCW\_2\_12**

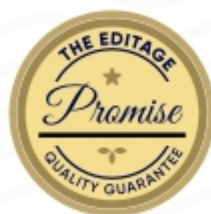

**Prabh Grewal**  
Senior Vice President - Editage

**editage** | helping you  
get published

Since 2002, Editage has helped over 430,000 authors publish around 1.2 million research papers in scholarly journals across over 1000 disciplines through editorial, translation, transcription, and publication support services. Editage is a brand of Cactus Communications ([cactusglobal.com](https://cactusglobal.com)), a science communication and technology company.

**GLOBAL :**  
+1(833) 979-0061 | [request@editage.com](mailto:request@editage.com)

**CHINA :**  
400-120-3020 或 021-6020-9400 |  
[fabiao@editage.cn](mailto:fabiao@editage.cn)

**CACTUS**
